# Supplementary material for: Association of the interferon signature metric with serological disease manifestations but not global activity scores in multiple cohorts of patients with SLE
Source: HighWire-hosted journal article supplement (doi:10.1136/lupus-2014-000080), 2015-03-01
Supplement: lupus-2014-000080supp.pdf [file lupus-2014-000080supp.pdf]

## **Association of the Interferon Signature Metric with serological disease manifestations but not global activity scores in multiple SLE patient cohorts**

William P. Kennedy,<sup>1</sup> Romeo Maciuca,<sup>2</sup> Kristen Wolslegel,<sup>3</sup> Wei Tew,<sup>3</sup> Alexander R. Abbas,<sup>4</sup> Christina Chaivorapol,<sup>4</sup> Alyssa Morimoto,<sup>5</sup> Jacqueline M. McBride,<sup>6</sup> Paul Brunetta,<sup>7</sup> Bruce C. Richardson,<sup>8</sup> John C. Davis, Jr.,<sup>1</sup> Timothy W. Behrens,<sup>9</sup> Michael J. Townsend<sup>3</sup>

<sup>1</sup>Departments of Early Clinical Development, Genentech, South San Francisco, CA, USA

<sup>2</sup>Biostatistics, Genentech, South San Francisco, CA, USA

<sup>3</sup>ITGR Diagnostics Discovery, Genentech, South San Francisco, CA, USA

<sup>4</sup>Bioinformatics and Computational Biology, Genentech, South San Francisco, CA, USA

<sup>5</sup>Bioanalytical Sciences, Genentech, South San Francisco, CA, USA

<sup>6</sup>Pharmacodynamic Biomarkers ITGR, Genentech, South San Francisco, CA, USA

<sup>7</sup>Late Stage Immunology Product Development, Genentech, South San Francisco, CA, USA

<sup>9</sup>ITGR Human Genetics, Genentech, South San Francisco, CA, USA

<sup>8</sup>Department of Medicine, University of Michigan and the Ann Arbor VA Hospital, Ann Arbor, MI, USA

### **Corresponding author:**

Michael J. Townsend, Ph.D.

ITGR Diagnostics Discovery

Genentech, Inc.

1 DNA Way

South San Francisco, CA 94080

Tel: 650-225-3239

Email: [townsend.michael@gene.com](mailto:townsend.michael@gene.com)

**Key Words:** Interferon Signature, SLE, lupus, disease activity, serological manifestations

## **SUPPLEMENTAL METHODS**

### ***SLE patient cohorts***

#### *University of Michigan SLE cohort*

SLE patients (n=61) were enrolled at the University of Michigan into an observational cohort. Patient enrollment and sample collection were carried out under the supervision of the Institutional Review Board of the University of Michigan Medical School (IRBMED: protocol reference 2002-0339). Demographics and baseline disease characteristics are summarized in Supplemental Table 1. Healthy control subjects (n=20) were age-matched.

#### *Rontalizumab Phase I trial<sup>16</sup>*

Results of the trial have been published and are present on ClinicalTrials.gov (Identifier NCT00541749). Sixty patients were enrolled with mild disease activity as defined by SELENA-SLEDAI, and continued their pre-enrollment background medications, including nonsteroidal anti-inflammatory drugs (NSAIDs), anti-malarials, and steroids up to 20 mg/day prednisone equivalent, for lupus management.

#### *EXPLORER: Assessment of flares in lupus patients enrolled in a Phase II/III study of rituximab<sup>17</sup>*

Patients had moderate to severe active extra-renal lupus (ERL), with active disease defined according to the British Isles Lupus Disease Activity Group (BILAG) index, and stable use of 1 immunosuppressive drug at entry. Patients with severe central nervous system or organ-threatening lupus were excluded.

#### *LUNAR: Lupus Nephritis Assessment with Rituximab<sup>18</sup>*

Patients had Class III/IV LN according to the 2003 International Society of Nephrology/Renal Pathology Society criteria determined by renal biopsy within previous 12 months and presence of proteinuria.

#### *ROSE: ROntalizumab Phase II Trial in Systemic lupus Erythematosus<sup>19</sup>*

The trial is registered on ClinicalTrials.gov (identifier NCT00962832). Patients had moderate to severe active ERL (active disease defined according to the BILAG index; 1 BILAG A or 2 BILAG B domains of disease involvement and severity), and positive antinuclear antibody (ANA). Patients were excluded if they had lupus nephritis (LN), unstable neuropsychiatric SLE, or a recent history of severe anti-phospholipid antibody syndrome.

### ***Blood RNA extraction and microarray analysis***

Samples of RNA from all SLE cohorts were extracted from peripheral blood mononuclear cells (PBMCs) isolated by Ficoll gradient and/or from whole blood samples collected in PAXgene tubes using the RNeasy Mini Kit (Qiagen, Valencia, CA). PBMC RNA samples from the University of Michigan cohort were profiled on Affymetrix Human Genome U133 Plus 2.0 expression microarrays. The microarrays were MAS 5.0 normalized in R 3.0.0; then probe sets were filtered using the default settings of the featureFilter function in the geneFilter Bioconductor package<sup>20</sup> to result in one probe set per gene. Samples and filtered probe sets were hierarchically clustered using a Euclidean distance metric and Ward linkage method using hclust (R stats package). Twenty clusters were derived using cutree (k=20) on the probe set dendrogram. Heatmap plots were generated in R. Probe sets were mapped to genes using the hgu133plus2.db (v. 2.9.0) Bioconductor annotation package. Differential expression of genes was assessed by linear modeling via the Limma package (Bioconductor). Moderated *t*-statistics from modeling were used to calculate the adjusted *p* values, using the Benjamini-Hochberg correction. Differential expression was defined as gene expression greater than 1.5-fold and the adjusted *p* value for the difference in gene expression was less than 0.2. Microarray

data have been deposited in the Gene Expression Omnibus data repository (GEO accession number GSE50772).

**Supplemental Figure 1: Unsupervised hierarchical clustering of microarray expression data from the University of Michigan SLE cohort.** Filtered microarray probes generated from microarray analysis of 20 healthy control subjects and 61 SLE patients underwent unsupervised clustering. The left sided figure bar is the heatmap color scale and refers to z-score values. The location of the Interferon Regulated Gene cluster is demarcated with an open box. The bar above the heatmap refers to diagnosis (SLE in yellow, healthy control in green) for each subject sample (pertaining to each column of the heatmap).

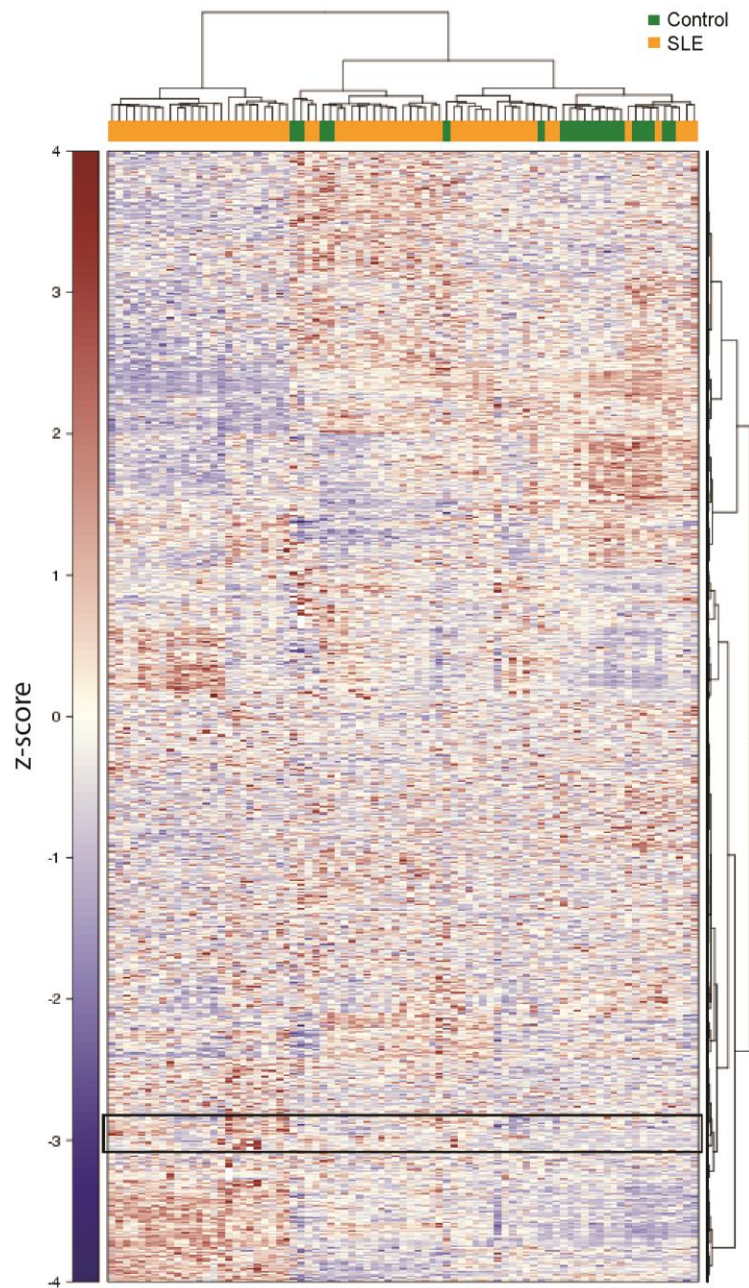

**Supplemental Table 1: Demographics and clinical characteristics of the University of Michigan SLE observational cohort**

| Parameter                           | University of Michigan SLE cohort |                    |                 |
|-------------------------------------|-----------------------------------|--------------------|-----------------|
|                                     | ISM-Low<br>(n=28)                 | ISM-High<br>(n=33) | Total<br>(N=61) |
| Age (years), mean (SD)              | 39 (9.7)                          | 37.6 (11.05)       | 38.2 (10.4)     |
| SLE duration (years), mean (SD)     | 8.2 (8.3)                         | 11.6 (8.3)         | 9.7 (8.3)       |
| Female, %                           | 96                                | 97                 | 97              |
| Race/Ethnicity, %                   |                                   |                    |                 |
| Black                               | 29                                | 33                 | 31              |
| Hispanic                            | 4                                 | 0                  | 2               |
| White                               | 64                                | 67                 | 66              |
| Other                               | 3                                 | 0                  | 1               |
| SELENA-SLEDAI, mean (SD)            | 5.8 (3.1)                         | 5.6 (3.2)          | 5.7 (3.1)       |
| Proteinuria (> 0.5 g ), %           | 13.6                              | 14.3               | 14              |
| Serum creatinine (mg/dL), mean (SD) | 1.03 (0.43)                       | 0.85 (0.28)        | 0.94 (0.37)     |
| Prednisone usage (mg), mean (SD)    | 20.3 (21.3)                       | 18.7 (17.7)        | 19.4 (19.3)     |

**Supplemental Table 2: Baseline peripheral blood populations in SLE trials stratified by ISM status**

| Parameter                                         | Trial                             | ISM-Low     | ISM-High    | p-value |
|---------------------------------------------------|-----------------------------------|-------------|-------------|---------|
| White Blood Cell Count (x10 <sup>9</sup> /L)      | LUNAR Trial (N=80)                | 9.88 (2.6)  | 7.07 (3.6)  | 0.0012  |
|                                                   | EXPLORER Trial (N=135)            | 9.04 (4.2)  | 6.47 (3.5)  | 0.0003  |
|                                                   | ROSE Trial (N=238)                | 7.20 (2.8)  | 5.54 (2.5)  | <0.0001 |
|                                                   | Phase I Rontalizumab Trial (N=60) | 6.37 (2.2)  | 5.26 (1.9)  | 0.0323  |
| Lymphocytes (absolute counts x10 <sup>9</sup> /L) | LUNAR Trial (N=80)                | 2.46 (1.7)  | 1.37 (0.9)  | 0.0158  |
|                                                   | EXPLORER Trial (N=135)            | 1.54 (1.0)  | 1.09 (0.6)  | 0.0154  |
|                                                   | ROSE Trial (N=238)                | 1.76 (0.8)  | 1.15 (0.6)  | <0.0001 |
|                                                   | Phase I Rontalizumab Trial (N=60) | 1.99 (0.8)  | 1.59 (0.6)  | 0.0608  |
| Neutrophils (absolute counts x10 <sup>9</sup> /L) | LUNAR Trial (N=80)                | 6.78 (1.8)  | 5.22 (3.0)  | 0.0107  |
|                                                   | EXPLORER Trial (N=135)            | 7.02 (3.9)  | 4.99 (3.2)  | 0.0036  |
|                                                   | ROSE Trial (N=238)                | 4.94 (2.6)  | 4.0 (2.2)   | 0.0087  |
|                                                   | Phase I Rontalizumab Trial (N=60) | 3.87 (1.6)  | 3.19 (1.5)  | 0.0781  |
| Monocytes (absolute counts x10 <sup>9</sup> /L)   | LUNAR Trial (N=80)                | 0.45 (0.19) | 0.34 (0.2)  | 0.0149  |
|                                                   | EXPLORER Trial (N=135)            | 0.34 (0.2)  | 0.30 (0.3)  | 0.0341  |
|                                                   | ROSE Trial (N=238)                | 0.34 (0.1)  | 0.28 (0.2)  | 0.0007  |
|                                                   | Phase I Rontalizumab Trial (N=60) | 0.32 (0.1)  | 0.32 (0.1)  | 0.81    |
| Eosinophils (absolute counts x10 <sup>9</sup> /L) | LUNAR Trial (N=80)                | 0.09 (0.08) | 0.08 (0.07) | 0.5662  |
|                                                   | EXPLORER Trial (N=135)            | 0.08 (0.08) | 0.04 (0.06) | 0.001   |
|                                                   | ROSE Trial (N=238)                | 0.10 (0.07) | 0.07 (0.06) | <0.0001 |
|                                                   | Phase I Rontalizumab Trial (N=60) | 0.14 (0.11) | 0.11 (0.09) | 0.14    |

Data shown as mean (SD) for baseline values as defined by last pre-treatment value. P values calculated using the Wilcoxon test.

**Supplemental Table 3: Multivariate linear model for the ISM**

Intercept refers to the free term of the linear regression model:

Predicted ISM = -4.045 -0.0013 \* CD4 + 0.810 \* (anti-ENA status = Positive) + 0.706\*Ln (BAFF)  
+ 0.205\*Ln (anti-dsDNA) - 0.049 \*(SLE duration)

| <b>Parameter</b>                        | <b>Coefficient Estimate</b> | <b>t statistic</b> | <b>p-value</b> |
|-----------------------------------------|-----------------------------|--------------------|----------------|
| Intercept                               | -4.045                      | -2.68              | 0.0079         |
| CD4 counts (/μL)                        | -0.0013                     | -4.48              | <0.0001        |
| anti-ENA status (Positive vs. Negative) | 0.810                       | 3.71               | 0.0003         |
| Ln(BAFF (IU/mL))                        | 0.706                       | 3.86               | 0.0002         |
| Ln(anti-dsDNA (IU/mL))                  | 0.205                       | 3.10               | 0.0022         |
| SLE duration (years)                    | -0.049                      | -3.16              | 0.0018         |

The t-statistic equals the coefficient estimate divided by the standard error used to derive a p-value for each coefficient.

**Supplemental Table 4: Reproducibility of ISM<sup>a</sup> categorization over 36 weeks in the placebo arm of the ROSE study**

| ISM Value                | Patients (n) | $P_{\text{rep}}$ %       |
|--------------------------|--------------|--------------------------|
| $\leq -0.5$              | 11           | 97                       |
| $> -0.5, \leq 1$         | 6            | 81                       |
| $> 1 \text{ to } \leq 2$ | 11           | 85                       |
| $> 2 \text{ to } \leq 3$ | 19           | 98                       |
| $\geq 3$                 | 14           | 100                      |
| All patients             | 61           | 94<br>(95% CI; 91 to 97) |

CI, confidence interval;  $P_{\text{rep}}$ , probability of reproducibility

<sup>a</sup> Data generated using a research-grade assay



**Supplemental Table 5: Identity of Affymetrix probes for 128 Interferon-regulated gene cluster identified in the University of Michigan SLE cohort PBMC microarray analysis**

| Probe Set ID | Gene Symbol  | Gene Title                                                                                |
|--------------|--------------|-------------------------------------------------------------------------------------------|
| 1552623_at   | HSH2D        | hematopoietic SH2 domain containing                                                       |
| 1555251_a_at | OTOF         | otoferlin                                                                                 |
| 1556643_at   | LOC100507535 | uncharacterized LOC100507535                                                              |
| 1568592_at   | TRIM69       | tripartite motif containing 69                                                            |
| 200814_at    | PSME1        | proteasome (prosome, macropain) activator subunit 1 (PA28 alpha)                          |
| 200887_s_at  | STAT1        | signal transducer and activator of transcription 1, 91kDa                                 |
| 200923_at    | LGALS3BP     | lectin, galactoside-binding, soluble, 3 binding protein                                   |
| 200986_at    | SERPING1     | serpin peptidase inhibitor, clade G (C1 inhibitor), member 1                              |
| 201315_x_at  | IFITM2       | interferon induced transmembrane protein 2                                                |
| 201641_at    | BST2         | bone marrow stromal cell antigen 2                                                        |
| 201649_at    | UBE2L6       | ubiquitin-conjugating enzyme E2L 6                                                        |
| 201762_s_at  | PSME2        | proteasome (prosome, macropain) activator subunit 2 (PA28 beta)                           |
| 201786_s_at  | ADAR         | adenosine deaminase, RNA-specific                                                         |
| 202086_at    | MX1          | myxovirus (influenza virus) resistance 1, interferon-inducible protein p78 (mouse)        |
| 202145_at    | LY6E         | lymphocyte antigen 6 complex, locus E                                                     |
| 202307_s_at  | TAP1         | transporter 1, ATP-binding cassette, sub-family B (MDR/TAP)                               |
| 202411_at    | IFI27        | interferon, alpha-inducible protein 27                                                    |
| 202446_s_at  | PLSCR1       | phospholipid scramblase 1                                                                 |
| 202688_at    | TNFSF10      | tumor necrosis factor (ligand) superfamily, member 10                                     |
| 202869_at    | OAS1         | 2'-5'-oligoadenylate synthetase 1, 40/46kDa                                               |
| 203153_at    | IFIT1        | interferon-induced protein with tetratricopeptide repeats 1                               |
| 203236_s_at  | LGALS9       | lectin, galactoside-binding, soluble, 9                                                   |
| 203258_at    | DRAP1        | DR1-associated protein 1 (negative cofactor 2 alpha)                                      |
| 203595_s_at  | IFIT5        | interferon-induced protein with tetratricopeptide repeats 5                               |
| 203773_x_at  | BLVRA        | biliverdin reductase A                                                                    |
| 203882_at    | IRF9         | interferon regulatory factor 9                                                            |
| 203964_at    | NMI          | N-myc (and STAT) interactor                                                               |
| 204279_at    | PSMB9        | proteasome (prosome, macropain) subunit, beta type, 9 (large multifunctional peptidase 2) |
| 204415_at    | IFI6         | interferon, alpha-inducible protein 6                                                     |
| 204439_at    | IFI44L       | interferon-induced protein 44-like                                                        |
| 204698_at    | ISG20        | interferon stimulated exonuclease gene 20kDa                                              |

|             |              |                                                                        |
|-------------|--------------|------------------------------------------------------------------------|
| 204804_at   | TRIM21       | tripartite motif containing 21                                         |
| 204858_s_at | TYMP         | thymidine phosphorylase                                                |
| 204972_at   | OAS2         | 2'-5'-oligoadenylate synthetase 2, 69/71kDa                            |
| 204994_at   | MX2          | myxovirus (influenza virus) resistance 2 (mouse)                       |
| 205098_at   | CCR1         | chemokine (C-C motif) receptor 1                                       |
| 205126_at   | VRK2         | vaccinia related kinase 2                                              |
| 205241_at   | SCO2         | SCO cytochrome oxidase deficient homolog 2 (yeast)                     |
| 205483_s_at | ISG15        | ISG15 ubiquitin-like modifier                                          |
| 205569_at   | LAMP3        | lysosomal-associated membrane protein 3                                |
| 205660_at   | OASL         | 2'-5'-oligoadenylate synthetase-like                                   |
| 206513_at   | AIM2         | absent in melanoma 2                                                   |
| 207777_s_at | SP140        | SP140 nuclear body protein                                             |
| 208436_s_at | IRF7         | interferon regulatory factor 7                                         |
| 208966_x_at | IFI16        | interferon, gamma-inducible protein 16                                 |
| 209417_s_at | IFI35        | interferon-induced protein 35                                          |
| 209546_s_at | APOL1        | apolipoprotein L, 1                                                    |
| 209568_s_at | RGL1         | ral guanine nucleotide dissociation stimulator-like 1                  |
| 209593_s_at | TOR1B        | torsin family 1, member B (torsin B)                                   |
| 209762_x_at | SP110        | SP110 nuclear body protein                                             |
| 210873_x_at | APOBEC3<br>A | apolipoprotein B mRNA editing enzyme, catalytic<br>polypeptide-like 3A |
| 211012_s_at | PML          | promyelocytic leukemia                                                 |
| 211138_s_at | KMO          | kynurenine 3-monooxygenase (kynurenine 3-hydroxylase)                  |
| 211267_at   | HESX1        | HESX homeobox 1                                                        |
| 212203_x_at | IFITM3       | interferon induced transmembrane protein 3                             |
| 212380_at   | FTSJD2       | FtsJ methyltransferase domain containing 2                             |
| 212657_s_at | IL1RN        | interleukin 1 receptor antagonist                                      |
| 213051_at   | ZC3HAV1      | zinc finger CCCH-type, antiviral 1                                     |
| 213261_at   | TRANK1       | tetratricopeptide repeat and ankyrin repeat containing 1               |
| 213293_s_at | TRIM22       | tripartite motif containing 22                                         |
| 213294_at   | EIF2AK2      | eukaryotic translation initiation factor 2-alpha kinase 2              |
| 213361_at   | TDRD7        | tudor domain containing 7                                              |
| 214022_s_at | IFITM1       | interferon induced transmembrane protein 1                             |
| 214453_s_at | IFI44        | interferon-induced protein 44                                          |
| 214511_x_at | FCGR1B       | Fc fragment of IgG, high affinity lb, receptor (CD64)                  |
| 217933_s_at | LAP3         | leucine aminopeptidase 3                                               |
| 217986_s_at | BAZ1A        | bromodomain adjacent to zinc finger domain, 1A                         |
| 218076_s_at | ARHGAP<br>17 | Rho GTPase activating protein 17                                       |
| 218231_at   | NAGK         | N-acetylglucosamine kinase                                             |
| 218400_at   | OAS3         | 2'-5'-oligoadenylate synthetase 3, 100kDa                              |
| 218429_s_at | C19orf66     | chromosome 19 open reading frame 66                                    |

|             |          |                                                                            |
|-------------|----------|----------------------------------------------------------------------------|
| 218543_s_at | PARP12   | poly (ADP-ribose) polymerase family, member 12                             |
| 218943_s_at | DDX58    | DEAD (Asp-Glu-Ala-Asp) box polypeptide 58                                  |
| 218986_s_at | DDX60    | DEAD (Asp-Glu-Ala-Asp) box polypeptide 60                                  |
| 219014_at   | PLAC8    | placenta-specific 8                                                        |
| 219062_s_at | ZCCHC2   | zinc finger, CCHC domain containing 2                                      |
| 219209_at   | IFIH1    | interferon induced with helicase C domain 1                                |
| 219211_at   | USP18    | ubiquitin specific peptidase 18                                            |
| 219352_at   | HERC6    | HECT and RLD domain containing E3 ubiquitin protein ligase family member 6 |
| 219356_s_at | CHMP5    | charged multivesicular body protein 5                                      |
| 219364_at   | DHX58    | DEXH (Asp-Glu-X-His) box polypeptide 58                                    |
| 219371_s_at | KLF2     | Kruppel-like factor 2 (lung)                                               |
| 219519_s_at | SIGLEC1  | sialic acid binding Ig-like lectin 1, sialoadhesin                         |
| 219684_at   | RTP4     | receptor (chemosensory) transporter protein 4                              |
| 219863_at   | HERC5    | HECT and RLD domain containing E3 ubiquitin protein ligase 5               |
| 220146_at   | TLR7     | toll-like receptor 7                                                       |
| 221680_s_at | ETV7     | ets variant 7                                                              |
| 221816_s_at | PHF11    | PHD finger protein 11                                                      |
| 221827_at   | RBCK1    | RanBP-type and C3HC4-type zinc finger containing 1                         |
| 222154_s_at | SPATS2L  | spermatogenesis associated, serine-rich 2-like                             |
| 222986_s_at | SHISA5   | shisa homolog 5 ( <i>Xenopus laevis</i> )                                  |
| 223220_s_at | PARP9    | poly (ADP-ribose) polymerase family, member 9                              |
| 223322_at   | RASSF5   | Ras association (RalGDS/AF-6) domain family member 5                       |
| 223501_at   | TNFSF13B | tumor necrosis factor (ligand) superfamily, member 13b                     |
| 223599_at   | TRIM6    | tripartite motif containing 6                                              |
| 224701_at   | PARP14   | poly (ADP-ribose) polymerase family, member 14                             |
| 225076_s_at | ZNFX1    | zinc finger, NFX1-type containing 1                                        |
| 225291_at   | PNPT1    | polyribonucleotide nucleotidyltransferase 1                                |
| 225344_at   | NCOA7    | nuclear receptor coactivator 7                                             |
| 225415_at   | DTX3L    | deltex 3-like ( <i>Drosophila</i> )                                        |
| 225636_at   | STAT2    | signal transducer and activator of transcription 2, 113kDa                 |
| 226603_at   | SAMD9L   | sterile alpha motif domain containing 9-like                               |
| 226702_at   | CMPK2    | cytidine monophosphate (UMP-CMP) kinase 2, mitochondrial                   |
| 226748_at   | LYSMD2   | LysM, putative peptidoglycan-binding, domain containing 2                  |
| 226757_at   | IFIT2    | interferon-induced protein with tetratricopeptide repeats 2                |
| 227609_at   | EPSTI1   | epithelial stromal interaction 1 (breast)                                  |
| 228152_s_at | DDX60L   | DEAD (Asp-Glu-Ala-Asp) box polypeptide 60-like                             |
| 228230_at   | PRIC285  | peroxisomal proliferator-activated receptor A interacting complex 285      |
| 228439_at   | BATF2    | basic leucine zipper transcription factor, ATF-like 2                      |

|             |           |                                                             |
|-------------|-----------|-------------------------------------------------------------|
| 228531_at   | SAMD9     | sterile alpha motif domain containing 9                     |
| 228617_at   | XAF1      | XIAP associated factor 1                                    |
| 229350_x_at | PARP10    | poly (ADP-ribose) polymerase family, member 10              |
| 229450_at   | IFIT3     | interferon-induced protein with tetratricopeptide repeats 3 |
| 230166_at   | KIAA1958  | KIAA1958                                                    |
| 230405_at   | C5orf56   | chromosome 5 open reading frame 56                          |
| 231455_at   | LINC00487 | long intergenic non-protein coding RNA 487                  |
| 231577_s_at | GBP1      | guanylate binding protein 1, interferon-inducible           |
| 231747_at   | CYSLTR1   | cysteinyl leukotriene receptor 1                            |
| 231769_at   | FBXO6     | F-box protein 6                                             |
| 232222_at   | C18orf49  | chromosome 18 open reading frame 49                         |
| 236285_at   | KLHDC7B   | kelch domain containing 7B                                  |
| 238327_at   | ODF3B     | outer dense fiber of sperm tails 3B                         |
| 238439_at   | ANKRD22   | ankyrin repeat domain 22                                    |
| 242020_s_at | ZBP1      | Z-DNA binding protein 1                                     |
| 242625_at   | RSAD2     | radical S-adenosyl methionine domain containing 2           |
| 32069_at    | N4BP1     | NEDD4 binding protein 1                                     |
| 35254_at    | TRAFD1    | TRAF-type zinc finger domain containing 1                   |
| 38269_at    | PRKD2     | protein kinase D2                                           |
